# Supplementary material for: The efficacy of immune checkpoint inhibitors in elderly patients: a meta-analysis and meta-regression
Source: PubMed Central journal article supplement — ESMO Open. 2022 Sep 23;7(5):100577. doi: 10.1016/j.esmoop.2022.100577 (PMC9588901; doi:10.1016/j.esmoop.2022.100577), 2022-09-23
Supplement: mmc1.pdf [file mmc1.pdf]

# Supplementary Figure 1

## A Overall survival forest plot

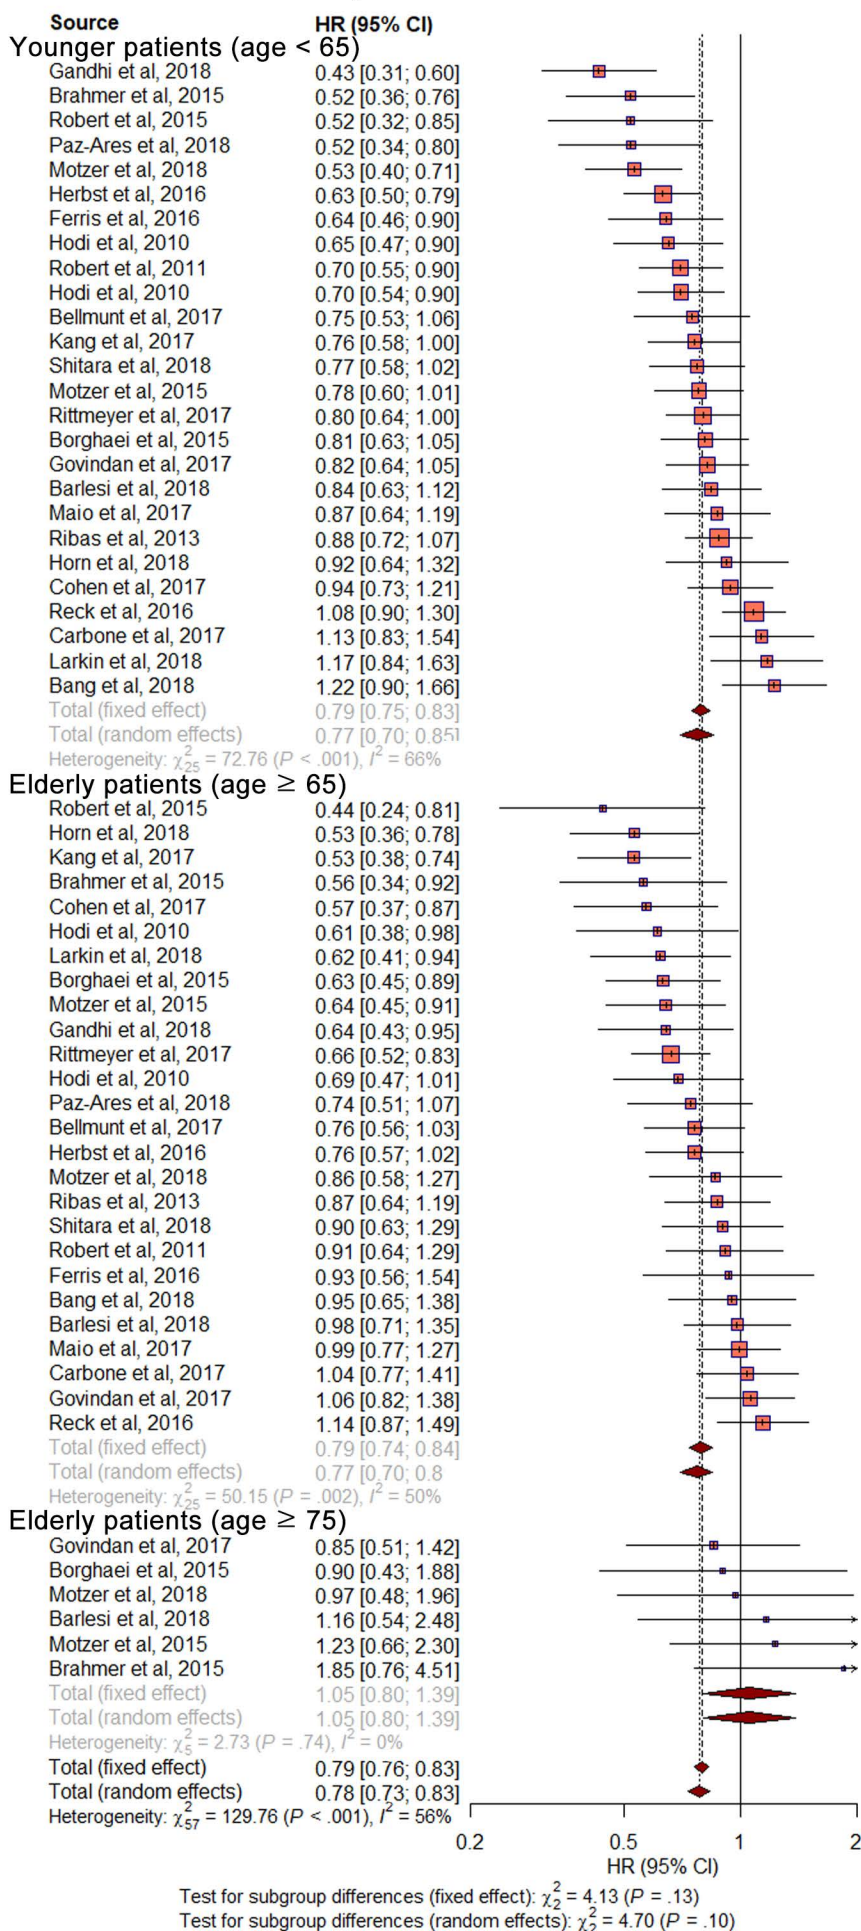

## B Progression-free survival forest plot

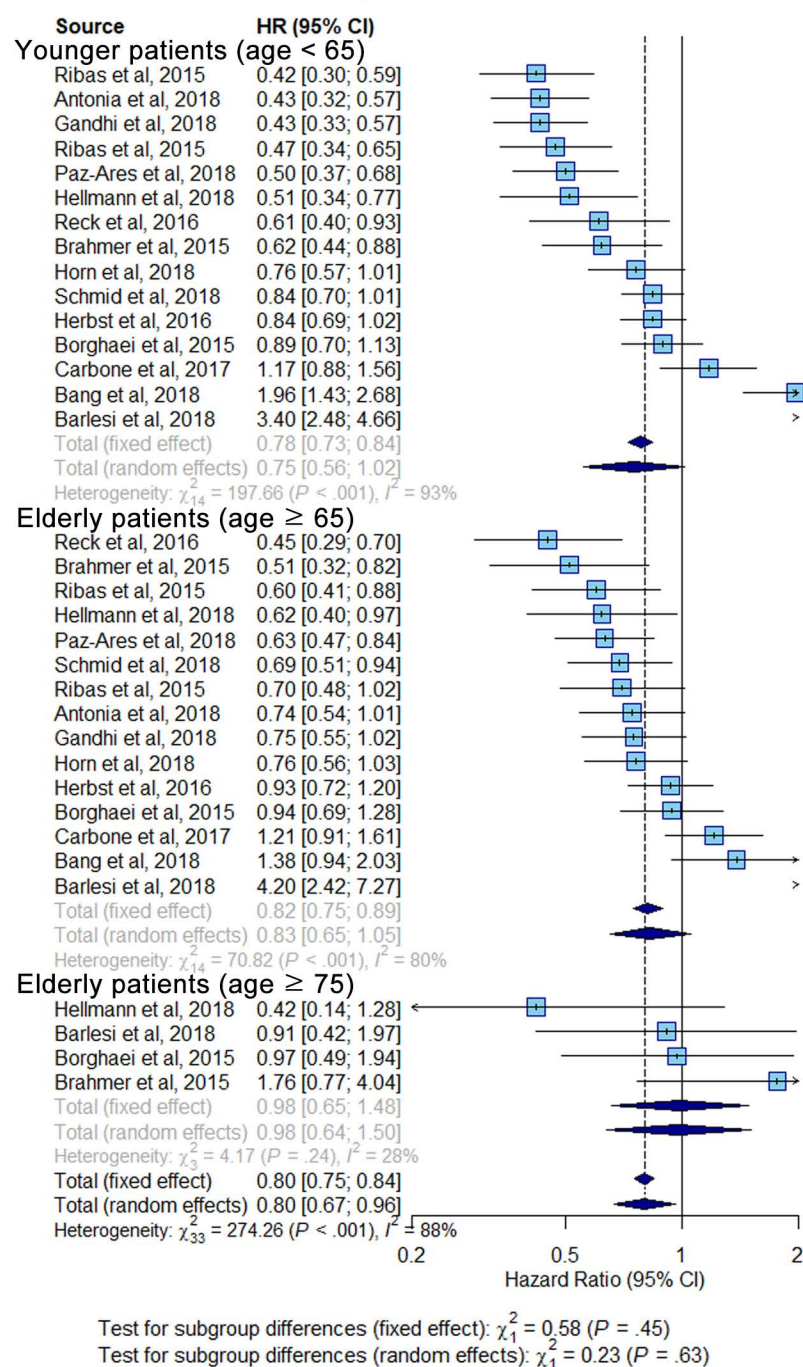

# Supplementary Figure 2

A

## Overall survival forest plot

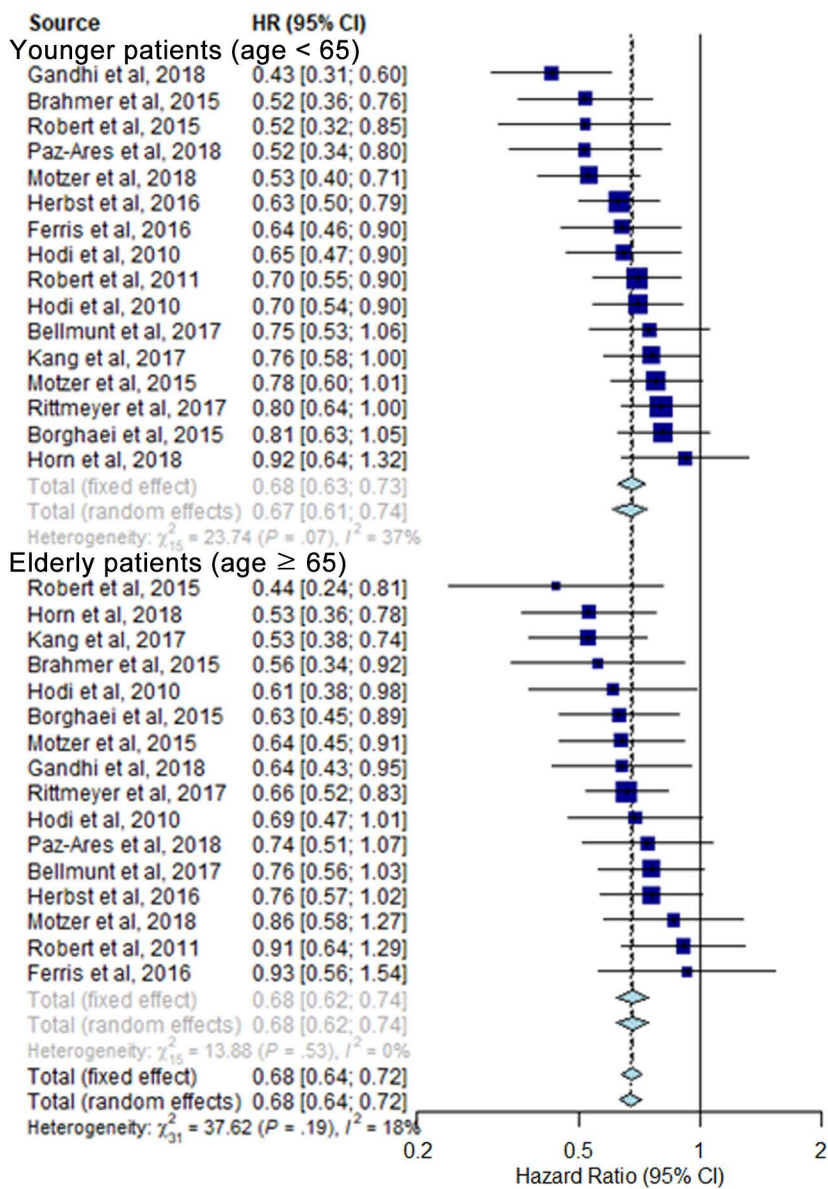

B

## Progression-free survival forest plot

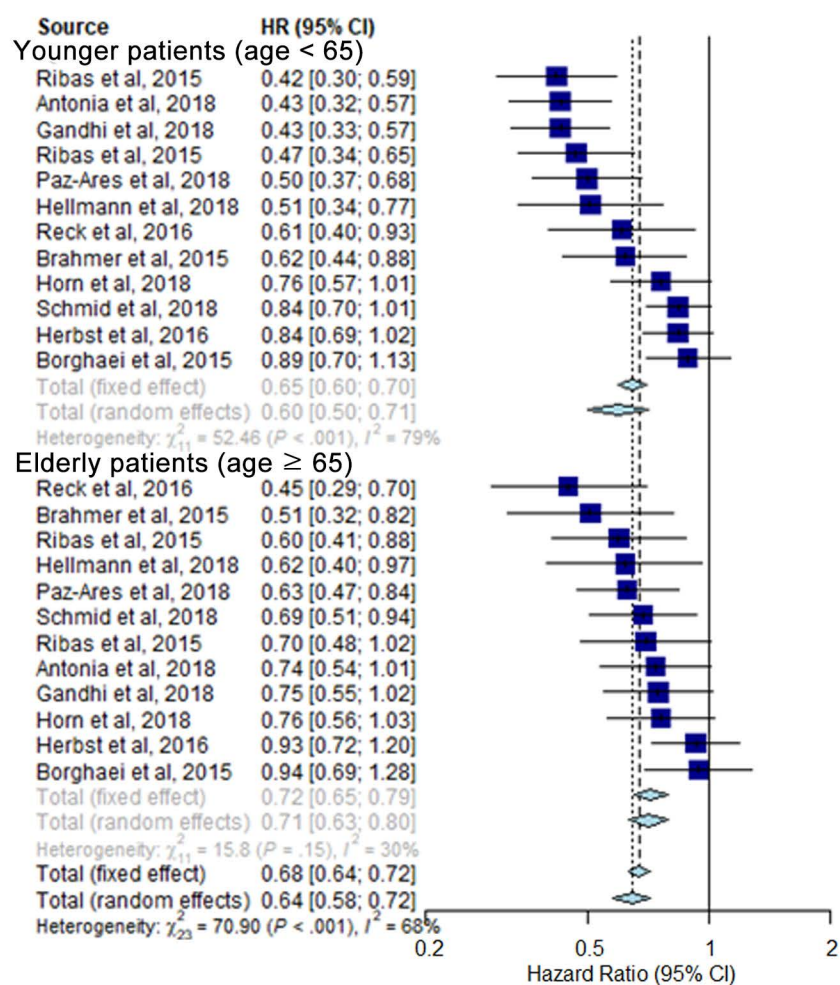

**Supplementary Table 1. PRISMA 2020 Checklist**

| Section and Topic             | Item # | Checklist item                                                                                                                                                                                                                                                                                       | Location where item is reported  |
|-------------------------------|--------|------------------------------------------------------------------------------------------------------------------------------------------------------------------------------------------------------------------------------------------------------------------------------------------------------|----------------------------------|
| <b>TITLE</b>                  |        |                                                                                                                                                                                                                                                                                                      |                                  |
| Title                         | 1      | Identify the report as a systematic review.                                                                                                                                                                                                                                                          | Page 1                           |
| <b>ABSTRACT</b>               |        |                                                                                                                                                                                                                                                                                                      |                                  |
| Abstract                      | 2      | See the PRISMA 2020 for Abstracts checklist.                                                                                                                                                                                                                                                         | Page 2                           |
| <b>INTRODUCTION</b>           |        |                                                                                                                                                                                                                                                                                                      |                                  |
| Rationale                     | 3      | Describe the rationale for the review in the context of existing knowledge.                                                                                                                                                                                                                          | Page 3                           |
| Objectives                    | 4      | Provide an explicit statement of the objective(s) or question(s) the review addresses.                                                                                                                                                                                                               | Page 3-4                         |
| <b>METHODS</b>                |        |                                                                                                                                                                                                                                                                                                      |                                  |
| Eligibility criteria          | 5      | Specify the inclusion and exclusion criteria for the review and how studies were grouped for the syntheses.                                                                                                                                                                                          | Page 4 and Figure 1              |
| Information sources           | 6      | Specify all databases, registers, websites, organisations, reference lists and other sources searched or consulted to identify studies. Specify the date when each source was last searched or consulted.                                                                                            | Page 4                           |
| Search strategy               | 7      | Present the full search strategies for all databases, registers and websites, including any filters and limits used.                                                                                                                                                                                 | Page 4                           |
| Selection process             | 8      | Specify the methods used to decide whether a study met the inclusion criteria of the review, including how many reviewers screened each record and each report retrieved, whether they worked independently, and if applicable, details of automation tools used in the process.                     | Page 4-5                         |
| Data collection process       | 9      | Specify the methods used to collect data from reports, including how many reviewers collected data from each report, whether they worked independently, any processes for obtaining or confirming data from study investigators, and if applicable, details of automation tools used in the process. | Page 5                           |
| Data items                    | 10a    | List and define all outcomes for which data were sought. Specify whether all results that were compatible with each outcome domain in each study were sought (e.g. for all measures, time points, analyses), and if not, the methods used to decide which results to collect.                        | Page 5 and Table 1-2             |
|                               | 10b    | List and define all other variables for which data were sought (e.g. participant and intervention characteristics, funding sources). Describe any assumptions made about any missing or unclear information.                                                                                         | Page 5 and Table 1-2             |
| Study risk of bias assessment | 11     | Specify the methods used to assess risk of bias in the included studies, including details of the tool(s) used, how many reviewers assessed each study and whether they worked independently, and if applicable, details of automation tools used in the process.                                    | Page 6 and Supplementary table 2 |
| Effect measures               | 12     | Specify for each outcome the effect measure(s) (e.g. risk ratio, mean difference) used in the synthesis or presentation of results.                                                                                                                                                                  | Page 5-6                         |
| Synthesis methods             | 13a    | Describe the processes used to decide which studies were eligible for each synthesis (e.g. tabulating the study intervention characteristics and comparing against the planned groups for each synthesis (item #5)).                                                                                 | Page 6                           |
|                               | 13b    | Describe any methods required to prepare the data for presentation or synthesis, such as handling of missing summary statistics, or data conversions.                                                                                                                                                | Not applicable                   |
|                               | 13c    | Describe any methods used to tabulate or visually display results of individual studies and syntheses.                                                                                                                                                                                               | Page 6 and Figure 2              |
|                               | 13d    | Describe any methods used to synthesize results and provide a rationale for the choice(s). If meta-analysis was performed, describe the model(s), method(s) to identify the presence and extent of statistical heterogeneity, and software package(s) used.                                          | Page 6-7                         |
|                               | 13e    | Describe any methods used to explore possible causes of heterogeneity among study results (e.g. subgroup analysis, meta-regression).                                                                                                                                                                 | Page 6 and                       |

| Section and Topic             | Item # | Checklist item                                                                                                                                                                                                                                                                       | Location where item is reported     |
|-------------------------------|--------|--------------------------------------------------------------------------------------------------------------------------------------------------------------------------------------------------------------------------------------------------------------------------------------|-------------------------------------|
|                               |        |                                                                                                                                                                                                                                                                                      | Table 3-4-5                         |
|                               | 13f    | Describe any sensitivity analyses conducted to assess robustness of the synthesized results.                                                                                                                                                                                         | Not applicable                      |
| Reporting bias assessment     | 14     | Describe any methods used to assess risk of bias due to missing results in a synthesis (arising from reporting biases).                                                                                                                                                              | Not applicable                      |
| Certainty assessment          | 15     | Describe any methods used to assess certainty (or confidence) in the body of evidence for an outcome.                                                                                                                                                                                | Not applicable                      |
| <b>RESULTS</b>                |        |                                                                                                                                                                                                                                                                                      |                                     |
| Study selection               | 16a    | Describe the results of the search and selection process, from the number of records identified in the search to the number of studies included in the review, ideally using a flow diagram.                                                                                         | Page 7-8 and Figure 1               |
|                               | 16b    | Cite studies that might appear to meet the inclusion criteria, but which were excluded, and explain why they were excluded.                                                                                                                                                          | Figure 1                            |
| Study characteristics         | 17     | Cite each included study and present its characteristics.                                                                                                                                                                                                                            | Page 7-8 and Table 1-2              |
| Risk of bias in studies       | 18     | Present assessments of risk of bias for each included study.                                                                                                                                                                                                                         | Page 8 and Supplementary table 2    |
| Results of individual studies | 19     | For all outcomes, present, for each study: (a) summary statistics for each group (where appropriate) and (b) an effect estimate and its precision (e.g. confidence/credible interval), ideally using structured tables or plots.                                                     | Page 8-9 and Table 1-2 and Figure 2 |
| Results of syntheses          | 20a    | For each synthesis, briefly summarise the characteristics and risk of bias among contributing studies.                                                                                                                                                                               | Page 8-11                           |
|                               | 20b    | Present results of all statistical syntheses conducted. If meta-analysis was done, present for each the summary estimate and its precision (e.g. confidence/credible interval) and measures of statistical heterogeneity. If comparing groups, describe the direction of the effect. | Page 8-11 and Table 3-4-5           |
|                               | 20c    | Present results of all investigations of possible causes of heterogeneity among study results.                                                                                                                                                                                       | Page 6                              |
|                               | 20d    | Present results of all sensitivity analyses conducted to assess the robustness of the synthesized results.                                                                                                                                                                           | Not applicable                      |
| Reporting biases              | 21     | Present assessments of risk of bias due to missing results (arising from reporting biases) for each synthesis assessed.                                                                                                                                                              | Not applicable                      |
| Certainty of evidence         | 22     | Present assessments of certainty (or confidence) in the body of evidence for each outcome assessed.                                                                                                                                                                                  | Page 9-10 and Table 1-5             |
| <b>DISCUSSION</b>             |        |                                                                                                                                                                                                                                                                                      |                                     |
| Discussion                    | 23a    | Provide a general interpretation of the results in the context of other evidence.                                                                                                                                                                                                    | Page 11-12                          |
|                               | 23b    | Discuss any limitations of the evidence included in the review.                                                                                                                                                                                                                      | Page 12-13                          |
|                               | 23c    | Discuss any limitations of the review processes used.                                                                                                                                                                                                                                | Page 12-13                          |
|                               | 23d    | Discuss implications of the results for practice, policy, and future research.                                                                                                                                                                                                       | Page 13                             |
| <b>OTHER INFORMATION</b>      |        |                                                                                                                                                                                                                                                                                      |                                     |
| Registration and protocol     | 24a    | Provide registration information for the review, including register name and registration number, or state that the review was not registered.                                                                                                                                       | Page 4                              |
|                               | 24b    | Indicate where the review protocol can be accessed, or state that a protocol was not prepared.                                                                                                                                                                                       | Page 4                              |

| Section and Topic                              | Item # | Checklist item                                                                                                                                                                                                                             | Location where item is reported |
|------------------------------------------------|--------|--------------------------------------------------------------------------------------------------------------------------------------------------------------------------------------------------------------------------------------------|---------------------------------|
|                                                | 24c    | Describe and explain any amendments to information provided at registration or in the protocol.                                                                                                                                            | Not applicable                  |
| Support                                        | 25     | Describe sources of financial or non-financial support for the review, and the role of the funders or sponsors in the review.                                                                                                              | Page 14                         |
| Competing interests                            | 26     | Declare any competing interests of review authors.                                                                                                                                                                                         | Page 14                         |
| Availability of data, code and other materials | 27     | Report which of the following are publicly available and where they can be found: template data collection forms; data extracted from included studies; data used for all analyses; analytic code; any other materials used in the review. | Page 4                          |

**Supplementary Table 2. Baseline characteristics of 26 randomized controlled studies for overall survival.**

| Source                        | Phase | Tumor type                       | Line | N   | Treatment                              | Control                           | Median age (years)                   | Median follow-up (months)                                          | N (%)       |             | OS, HR (95% CI)     |                     |                     |
|-------------------------------|-------|----------------------------------|------|-----|----------------------------------------|-----------------------------------|--------------------------------------|--------------------------------------------------------------------|-------------|-------------|---------------------|---------------------|---------------------|
|                               |       |                                  |      |     |                                        |                                   |                                      |                                                                    | <65 y       | ≥65 y       | All                 | <65 y               | ≥65 y               |
| Gandhi, 2018 <sup>24</sup>    | 3     | NSCLC                            | 1    | 616 | Pembrolizumab + Platinum               | Placebo, Platinum                 | Int: 65 (34–84);<br>cont: 64(34-84)  | 10.5<br>(0.2-20.4)                                                 | 312<br>(51) | 304<br>(49) | 0.49<br>(0.38–0.64) | 0.43<br>(0.31–0.61) | 0.64<br>(0.43–0.95) |
| Barlesi, 2018 <sup>25</sup>   | 3     | NSCLC                            | >1   | 264 | Avelumab                               | Docetaxel                         | Int: 64 (58–59);<br>cont: 63 (57-69) | 18.3 (IQR,<br>13.2–22.7)                                           | 134<br>(51) | 130<br>(49) | 0.90<br>(0.72–1.12) | 0.84<br>(0.63–1.13) | 0.98<br>(0.71–1.34) |
| Paz-Ares, 2018 <sup>26</sup>  | 3     | NSCLC                            | 1    | 559 | Pembrolizumab + ICC                    | Placebo + ICC                     | Int: 65 (29–87);<br>cont: 65 (36-88) | 7.8<br>(0.1–19.1)                                                  | 254<br>(45) | 305<br>(55) | 0.64<br>(0.49–0.85) | 0.52<br>(0.34–0.80) | 0.74<br>(0.51–1.07) |
| Horn, 2018 <sup>29</sup>      | 3     | SCLC                             | 1    | 403 | Atezolizumab + carboplatin + etoposide | Placebo + carboplatin + etoposide | Int: 64 (28–90);<br>cont: 64 (26–87) | 13.9 (NR)                                                          | 217<br>(54) | 186<br>(46) | 0.70<br>(0.54–0.91) | 0.92<br>(0.64–1.32) | 0.53<br>(0.36–0.77) |
| Larkin, 2018 <sup>30</sup>    | 3     | Melanoma                         | >1   | 405 | Nivolumab                              | Placebo                           | 61 (23–88)                           | 24 (NR)                                                            | 257<br>(63) | 148<br>(37) | 0.92<br>(0.71–1.18) | 1.17<br>(0.84–1.63) | 0.62<br>(0.41–0.94) |
| Shitara, 2018 <sup>32</sup>   | 3     | Gastric or GE junction carcinoma | 2    | 395 | Pembrolizumab                          | Paclitaxel                        | 62.5 (54–70)                         | 7.9 (IQR,<br>3.4–14.6)                                             | 232<br>(59) | 163<br>(41) | 0.82<br>(0.66–1.03) | 0.77<br>(0.58–1.02) | 0.90<br>(0.63–1.29) |
| Bang, 2018 <sup>33</sup>      | 3     | Gastric or GE junction carcinoma | 3    | 371 | Avelumab                               | CTx                               | 59 (29–86)                           | 8.0 weeks*<br>(2–66)                                               | 230<br>(62) | 141<br>(38) | 1.1<br>(0.9–1.4)    | 1.22<br>(0.89–1.65) | 0.95<br>(0.65–1.38) |
| Motzer, 2018 <sup>34</sup>    | 3     | ccRCC                            | 1    | 847 | Nivolumab + ipilimumab                 | Sunitinib                         | Int: 62 (26–85);<br>cont: 51 (21–85) | 25.2 (NR)                                                          | 524<br>(62) | 323<br>(38) | 0.66<br>(0.53–0.82) | 0.53<br>(0.40–0.71) | 0.86<br>(0.58–1.27) |
| Govindan, 2017 <sup>62</sup>  | 3     | NSCLC                            | 1    | 749 | Ipilimumab + docetaxel + carboplatin   | Placebo + docetaxel + carboplatin | 64 (28–85)                           | Int: 12.5(NR);<br>Cont: 11.8(NR)                                   | 380<br>(51) | 369<br>(49) | 0.91<br>(0.77–1.07) | 0.82<br>(0.64–1.04) | 1.06<br>(0.81–1.37) |
| Carbone, 2017 <sup>36</sup>   | 3     | NSCLC                            | 1    | 541 | Nivolumab                              | ICC                               | 64 (29–89)                           | 13.5 (NR)                                                          | 281<br>(52) | 260<br>(48) | 1.08<br>(0.87–1.34) | 1.13<br>(0.83–1.54) | 1.04<br>(0.77–1.41) |
| Rittmeyer, 2017 <sup>37</sup> | 3     | NSCLC                            | 1    | 850 | Atezolizumab                           | Docetaxel                         | 64 (33–85)                           | 21 (NR)                                                            | 453<br>(53) | 397<br>(47) | 0.73<br>(0.62-0.87) | 0.80<br>(0.64-1.00) | 0.66<br>(0.52-0.83) |
| Cohen, 2017 <sup>38</sup>     | 3     | HNSCC                            | 2    | 495 | Pembrolizumab                          | ICC                               | 60 (19–85)                           | 7.3                                                                | 332<br>(67) | 163<br>(33) | 0.80<br>(0.65–0.98) | 0.94<br>(0.73–1.20) | 0.57<br>(0.37–0.87) |
| Bellmunt, 2017 <sup>39</sup>  | 3     | Urothelial carcinoma             | >1   | 542 | Pembrolizumab                          | ICC                               | 66 (26–88)                           | 14.1<br>(9.9–22.1)                                                 | 230<br>(52) | 312<br>(48) | 0.73<br>(0.59–0.91) | 0.75<br>(0.53–1.05) | 0.76<br>(0.56–1.02) |
| Kang, 2017 <sup>40</sup>      | 3     | Gastric or GE junction carcinoma | >1   | 493 | Nivolumab                              | Placebo                           | 62 (IQR, 53–69)                      | Int: 8.87 (IQR,<br>6.57–12.37);<br>cont: 8.59 (IQR,<br>5.65–11.37) | 284<br>(58) | 209<br>(42) | 0.65<br>(0.53–0.80) | 0.76<br>(0.58–1.00) | 0.53<br>(0.38–0.74) |
| Maio, 2017 <sup>41</sup>      | 3     | Mesothelioma                     | >1   | 571 | Tremelimumab                           | Placebo                           | 67 (IQR, 60–73)                      | NR                                                                 | 237<br>(42) | 334<br>(58) | 0.92<br>(0.76–1.12) | 0.87<br>(0.64–1.20) | 0.99<br>(0.77–1.26) |
| Ferris, 2016 <sup>42</sup>    | 3     | HNSCC                            | >1   | 361 | Nivolumab                              | ICC                               | 60 (28–83)                           | 5.1<br>(0–16.8)                                                    | 248<br>(69) | 113<br>(31) | 0.69<br>(0.53–0.91) | 0.64<br>(0.45–0.89) | 0.93<br>(0.56–1.54) |

|                              |     |          |    |          |                                   |                                |                 |                                       |             |             |                     |                     |                     |
|------------------------------|-----|----------|----|----------|-----------------------------------|--------------------------------|-----------------|---------------------------------------|-------------|-------------|---------------------|---------------------|---------------------|
| Herbst, 2016 <sup>44</sup>   | 2,3 | NSCLC    | >1 | 103<br>3 | Pembrolizumab                     | Docetaxel                      | 63 (IQR, 54–70) | 13.1 (IQR, 8.6–17.7)                  | 604<br>(58) | 429<br>(42) | 0.67<br>(0.56–0.80) | 0.63<br>(0.50–0.79) | 0.76<br>(0.57–1.02) |
| Reck, 2016 <sup>43</sup>     | 3   | SCLC     | 1  | 954      | Ipilimumab + etoposide + platinum | Placebo + etoposide + platinum | 63 (35–85)      | Int: 10.5 (NR);<br>cont: 10.2 (NR)    | 576<br>(60) | 378<br>(40) | 0.94<br>(0.81–1.09) | 1.08<br>(0.9–1.31)  | 1.14<br>(0.87–1.49) |
| Brahmer, 2015 <sup>46</sup>  | 3   | NSCLC    | >1 | 272      | Nivolumab                         | Docetaxel                      | 63 (39–85)      | 11.0 (NR)                             | 152<br>(56) | 120<br>(44) | 0.59<br>(0.44–0.78) | 0.52<br>(0.35–0.75) | 0.56<br>(0.34–0.91) |
| Borghaei, 2015 <sup>47</sup> | 3   | NSCLC    | >1 | 582      | Nivolumab                         | Docetaxel                      | 62 (21–88)      | 13.2 (NR)                             | 339<br>(58) | 243<br>(42) | 0.75<br>(0.62–0.91) | 0.81<br>(0.62–1.04) | 0.63<br>(0.45–0.89) |
| Robert, 2015 <sup>48</sup>   | 3   | Melanoma | 1  | 418      | Nivolumab                         | Dacarbazine                    | 65 (18–87)      | Int:8.9 (NR);<br>cont:6.8 (NR)        | 200<br>(48) | 218<br>(52) | 0.42<br>(0.30–0.59) | 0.52<br>(0.32–0.85) | 0.44<br>(0.24–0.81) |
| Motzer, 2015 <sup>49</sup>   | 3   | ccRCC    | >1 | 821      | Nivolumab                         | Everolimus                     | 62 (23–88)      | NR                                    | 497<br>(61) | 324<br>(39) | 0.76<br>(0.62–0.92) | 0.78<br>(0.60–1.01) | 0.64<br>(0.45–0.91) |
| Ribas, 2013 <sup>63</sup>    | 3   | Melanoma | 1  | 655      | Tremelimumab                      | ICC                            | 57 (22–90)      | NR                                    | 455<br>(69) | 200<br>(31) | 0.88<br>(0.75–1.04) | 0.88<br>(0.72–1.07) | 0.87<br>(0.64–1.19) |
| Robert, 2011 <sup>53</sup>   | 3   | Melanoma | 1  | 502      | Ipilimumab + Dacarbazine          | Placebo + Dacarbazine          | 56.9 (NR)       | 54 (NR)                               | 342<br>(68) | 160<br>(32) | 0.72<br>(0.59–0.87) | 0.70<br>(0.55–0.90) | 0.91<br>(0.64–1.28) |
| Hodi, 2010 <sup>52</sup>     | 3   | Melanoma | >1 | 273      | Ipilimumab                        | gp100                          | 56.8 (NR)       | 21.0<br>(ipilimumab + gp100),         | 189<br>(69) | 84<br>(31)  | 0.64<br>(0.49–0.84) | 0.65<br>(0.47–0.90) | 0.61<br>(0.38–0.99) |
| Hodi, 2010 <sup>52</sup>     | 3   | Melanoma | >1 | 539      | Ipilimumab + gp100                | gp100                          | 56.2 (NA)       | 27.8<br>(ipilimumab),<br>17.2 (gp100) | 385<br>(71) | 154<br>(29) | 0.69<br>(0.56–0.85) | 0.70<br>(0.54–0.90) | 0.69<br>(0.47–1.01) |

#subgroup of patients with PD-L1+

Abbreviations: NSCLC, non-small cell lung cancer; SCLC, small cell lung cancer; HNSCC, head and neck squamous cell carcinoma; RT, radiotherapy; CTx, chemotherapy; GE, gastroesophageal; ccRCC, clear cell renal cell carcinoma; Cont, control group, PFS, progression-free survival; OS, overall survival; HR, hazard ratio; CI, confidence interval; ICC, investigator's choice of chemotherapy; int, intervention; group; IQR, interquartile range; NR, not reported; N, number; CI, confidence interval

**Supplementary Table 3. Baseline characteristics of 15 randomized controlled studies for progression-free survival.**

| Source                       | Phase | Tumor type                       | Line | N    | Treatment                              | Control                           | Median age (years)                   | Median follow-up (months) | N (%)       |             | PFS, HR (95% CI)    |                                                               |                               |
|------------------------------|-------|----------------------------------|------|------|----------------------------------------|-----------------------------------|--------------------------------------|---------------------------|-------------|-------------|---------------------|---------------------------------------------------------------|-------------------------------|
|                              |       |                                  |      |      |                                        |                                   |                                      |                           | <65 y       | ≥65 y       | All                 | <65 y                                                         | ≥65 y                         |
| Gandhi, 2018 <sup>24</sup>   | 3     | NSCLC                            | 1    | 616  | Pembrolizumab + Platinum               | Placebo, Platinum                 | Int: 65 (34–84);<br>cont: 64 (34–84) | 10.5<br>(0.2–20.4)        | 312<br>(51) | 304<br>(49) | 0.52<br>(0.43–0.64) | 0.43<br>(0.32–0.56)                                           | 0.75<br>(0.55–1.02)           |
| Barlesi, 2018 <sup>25</sup>  | 3     | NSCLC                            | >1   | 264  | Avelumab                               | Docetaxel                         | Int: 64 (58–59);<br>cont: 63 (57–69) | 18.3 (IQR,<br>13.2–22.7)  | 134<br>(51) | 130<br>(49) | 3.4<br>(2.7–4.9)    | 3.4<br>(2.5–4.7) <sup>#</sup>                                 | 4.2<br>(2.1–6.3) <sup>#</sup> |
| Paz-Ares, 2018 <sup>26</sup> | 3     | NSCLC                            | 1    | 559  | Pembrolizumab + ICC                    | Placebo + ICC                     | Int: 65 (29–87);<br>cont: 65 (36–88) | 7.8<br>(0.1–19.1)         | 254<br>(45) | 305<br>(55) | 0.56<br>(0.45–0.70) | 0.50<br>(0.37–0.69)                                           | 0.63<br>(0.47–0.84)           |
| Antonia, 2018 <sup>27</sup>  | 3     | NSCLC                            | >1   | 713  | Durvalumab                             | Placebo                           | 64 (23–90)                           | 25.2<br>(0.2–43.1)        | 391<br>(55) | 322<br>(45) | 0.55<br>(0.45–0.68) | 0.43<br>(0.32–0.57)                                           | 0.74<br>(0.54–1.01)           |
| Hellmann, 2018 <sup>28</sup> | 3     | NSCLC                            | 1    | 326  | Nivolumab + ipilimumab                 | CTx                               | 64 (41–87)                           | NR                        | 156<br>(48) | 170<br>(52) | 0.58<br>(0.43–0.77) | 0.51<br>(0.34–0.77)                                           | 0.62<br>(0.40–0.97)           |
| Horn, 2018 <sup>29</sup>     | 3     | SCLC                             | 1    | 403  | Atezolizumab + carboplatin + etoposide | Placebo + carboplatin + etoposide | Int: 64 (28–90);<br>cont: 64 (26–87) | 13.9 (NR)                 | 217<br>(54) | 186<br>(46) | 0.77<br>(0.62–0.96) | 0.76<br>(0.57–1.01)                                           | 0.76<br>(0.56–1.03)           |
| Schmid, 2018 <sup>31</sup>   | 3     | Breast cancer                    | 1    | 902  | Atezolizumab + nab-paclitaxel          | Placebo + nab-paclitaxel          | 55 (20–82)                           | 12.9                      | 683<br>(76) | 219<br>(24) | 0.81<br>(0.70–0.93) | 18–40yr: 0.79<br>(0.53–1.16),<br>41–64yr: 0.84<br>(0.70–1.01) | 0.69<br>(0.51–0.94)           |
| Bang, 2018 <sup>33</sup>     | 3     | Gastric or GE junction carcinoma | 3    | 371  | Avelumab                               | CTx                               | 59 (29–86)                           | 8.0 weeks*<br>(2–66)      | 230<br>(62) | 141<br>(38) | 1.73<br>(1.4–2.2)   | 1.96<br>(1.43–2.67)                                           | 1.38<br>(0.94–2.04)           |
| Carbone, 2017 <sup>36</sup>  | 3     | NSCLC                            | 1    | 541  | Nivolumab                              | ICC                               | 64 (29–89)                           | 13.5 (NR)                 | 281<br>(52) | 260<br>(48) | 1.19<br>(0.97–1.46) | 1.17<br>(0.88–1.56)                                           | 1.21<br>(0.91–1.62)           |
| Reck, 2016 <sup>43</sup>     | 3     | NSCLC                            | 1    | 305  | Pembrolizumab                          | ICC                               | 65 (33–90)                           | 11.2<br>(6.3–19.7)        | 141<br>(46) | 164<br>(54) | 0.50<br>(0.37–0.68) | 0.61<br>(0.40–0.92)                                           | 0.45<br>(0.29–0.70)           |
| Herbst, 2016 <sup>44</sup>   | 2,3   | NSCLC                            | >1   | 1033 | Pembrolizumab                          | Docetaxel                         | 63 (IQR, 54–70)                      | 13.1 (IQR,<br>8.6–17.7)   | 604<br>(58) | 429<br>(42) | 0.85<br>(0.73–0.98) | 0.84<br>(0.69–1.02)                                           | 0.93<br>(0.72–1.19)           |
| Brahmer, 2015 <sup>46</sup>  | 3     | NSCLC                            | >1   | 272  | Nivolumab                              | Docetaxel                         | 63 (39–85)                           | 11.0 (NR)                 | 152<br>(56) | 120<br>(44) | 0.63<br>(0.48–0.82) | 0.62<br>(0.44–0.89)                                           | 0.51<br>(0.32–0.82)           |
| Borghaei, 2015 <sup>47</sup> | 3     | NSCLC                            | >1   | 582  | Nivolumab                              | Docetaxel                         | 62 (21–88)                           | 13.2 (NR)                 | 339<br>(58) | 243<br>(42) | 0.91<br>(0.76–1.09) | 0.89<br>(0.70–1.13)                                           | 0.94<br>(0.69–1.27)           |
| Ribas, 2015 <sup>50</sup>    | 2     | Melanoma                         | >1   | 359  | Pembrolizumab 2mg/kg                   | CTx                               | 62 (15–87)                           | NR                        | 200<br>(56) | 159<br>(44) | 0.57<br>(0.45–0.73) | 0.47<br>(0.34–0.66)                                           | 0.70<br>(0.48–1.01)           |
| Ribas, 2015 <sup>50</sup>    | 2     | Melanoma                         | >1   | 360  | Pembrolizumab 10mg/kg                  | CTx                               | 60 (27–89)                           | NR                        | 204<br>(57) | 156<br>(43) | 0.50<br>(0.37–0.64) | 0.42<br>(0.30–0.59)                                           | 0.60<br>(0.41–0.88)           |



---

#subgroups of patients with PD-L1-positive

Abbreviations: NSCLC, non-small cell lung cancer; SCLC, small cell lung cancer; HNSCC, head and neck squamous cell carcinoma; RT, radiotherapy; CTx, chemotherapy; GE, gastroesophageal; ccRCC, clear cell renal cell carcinoma; Cont, control group, PFS, progression-free survival; OS, overall survival; HR, hazard ratio; CI, confidence interval; ICC, investigator's choice of chemotherapy; int, intervention; group; IQR, interquartile range; NR, not reported; N, number; CI, confidence interval

---

**Supplementary Table 4.** Summary of Jadad score by randomization, blinding, and account. A score of 0–2 is considered low, and a score of 3–5 is defined as high quality.

| <b>Study (Year)</b>   | <b>Randomization</b> | <b>Blinding</b> | <b>Account</b> | <b>Jadad Score</b> |
|-----------------------|----------------------|-----------------|----------------|--------------------|
| Barlesi et al, 2018   | 2                    | 0               | 1              | 3                  |
| Bellmunt et al, 2017  | 2                    | 0               | 1              | 3                  |
| Borghaei et al, 2015  | 2                    | 0               | 1              | 3                  |
| Brahmer et al, 2015   | 2                    | 0               | 1              | 3                  |
| Carbone et al, 2017   | 2                    | 0               | 1              | 3                  |
| Ferris et al, 2016    | 2                    | 0               | 1              | 3                  |
| Herbst et al, 2016    | 2                    | 0               | 1              | 3                  |
| Larkin et al, 2018    | 2                    | 0               | 1              | 3                  |
| Motzer et al, 2015    | 2                    | 0               | 1              | 3                  |
| Motzer et al, 2018    | 2                    | 0               | 1              | 3                  |
| Reck et al, 2016      | 2                    | 0               | 1              | 5                  |
| Ribas et al, 2013     | 2                    | 0               | 1              | 3                  |
| Rittmeyer et al, 2017 | 2                    | 0               | 1              | 5                  |
| Robert et al, 2015    | 2                    | 0               | 1              | 3                  |
| Coehn et al, 2017     | 2                    | 0               | 1              | 3                  |
| Bang et al, 2018      | 2                    | 0               | 1              | 3                  |
| Ribas et al, 2015     | 2                    | 0               | 1              | 3                  |
| Shitara et al, 2018   | 2                    | 0               | 1              | 3                  |
| Hellmann et al, 2018  | 2                    | 0               | 1              | 3                  |
| Schmid et al, 2018    | 2                    | 0               | 1              | 3                  |
| Antonia et al, 2018   | 2                    | 2               | 1              | 5                  |
| Gandhi et al, 2018    | 2                    | 2               | 1              | 5                  |
| Govindan et al, 2017  | 2                    | 2               | 1              | 5                  |
| Horn et al, 2018      | 2                    | 2               | 1              | 5                  |
| Kang et al, 2017      | 2                    | 2               | 1              | 5                  |
| Maio et al, 2017      | 2                    | 2               | 1              | 5                  |
| Paz-Arez et al, 2018  | 2                    | 2               | 1              | 5                  |
| Reck et al, 2016      | 2                    | 2               | 1              | 5                  |
| Robert et al, 2011    | 2                    | 2               | 1              | 5                  |
| Hodi et al, 2010      | 2                    | 2               | 1              | 5                  |

**Supplementary Table 5.** Subgroup analysis of immunotherapy efficacy in terms of overall survival (OS) between younger age (<65 years old) and older age (≥65 years old) in clinical trials with positive outcomes.

| Variables                    | Number of studies | Number of participants |       |       | Pooled HR (95% CI) |                   |                   | Test for Difference |
|------------------------------|-------------------|------------------------|-------|-------|--------------------|-------------------|-------------------|---------------------|
|                              |                   | all                    | <65   | ≥65   | all                | <65               | ≥65               | <i>P</i> value      |
| <b>All</b>                   | 16                | 9,111                  | 5,230 | 3,881 | 0.67 (0.64, 0.71)  | 0.67 (0.61, 0.74) | 0.68 (0.62, 0.74) | 0.85                |
| <b>Primary disease site</b>  |                   |                        |       |       |                    |                   |                   |                     |
| NSCLC                        | 7                 | 4,454                  | 2,344 | 2,110 | 0.67 (0.60, 0.74)  | 0.64 (0.53, 0.77) | 0.69 (0.61, 0.78) | 0.50                |
| melanoma                     | 4                 | 1,732                  | 1,116 | 616   | 0.62 (0.51, 0.77)  | 0.67 (0.58, 0.78) | 0.69 (0.52, 0.90) | 0.89                |
| Other tumors                 | 5                 | 2,925                  | 1,770 | 1,155 | 0.69 (0.63, 0.77)  | 0.71 (0.59, 0.85) | 0.66 (0.53, 0.81) | 0.59                |
| <b>Type of immunotherapy</b> |                   |                        |       |       |                    |                   |                   |                     |
| anti-PD-1/PD-L1 antibody     | 12                | 6,950                  | 3,790 | 3,160 | 0.66 (0.61, 0.72)  | 0.68 (0.60, 0.77) | 0.66 (0.59, 0.72) | 0.69                |
| Anti-CTLA-4 antibody         | 3                 | 1,314                  | 916   | 398   | 0.69 (0.61, 0.78)  | 0.69 (0.59, 0.80) | 0.75 (0.59, 0.96) | 0.54                |
| Combination treatment        | 1                 | 847                    | 524   | 323   | -                  | -                 | -                 | -                   |
| <b>Line of treatment</b>     |                   |                        |       |       |                    |                   |                   |                     |
| 0                            | 9                 | 4,916                  | 2,928 | 1,988 | 0.69 (0.64, 0.74)  | 0.70 (0.64, 0.77) | 0.67 (0.60, 0.76) | 0.61                |
| 1                            | 7                 | 4,195                  | 2,302 | 1,893 | 0.63 (0.55, 0.72)  | 0.62 (0.51, 0.77) | 0.69 (0.59, 0.80) | 0.44                |

Abbreviations: NSCLC, non-small cell lung cancer; HR, hazard ratio; CI, confidence interval

**Supplementary Table 6.** Subgroup analysis of immunotherapy efficacy in terms of progression-free survival (PFS) between younger age (<65 years old) and older age (≥65 years old) in clinical trials with positive outcomes.

| Variables                    | Number of studies | Number of participants |       |       | Pooled HR (95% CI) |                   |                   | Test for Difference |
|------------------------------|-------------------|------------------------|-------|-------|--------------------|-------------------|-------------------|---------------------|
|                              |                   | all                    | <65   | ≥65   | all                | <65               | ≥65               | <i>P</i> value      |
| <b>All</b>                   | 12                | 6,430                  | 3,653 | 2,777 | 0.64 (0.56, 0.73)  | 0.60 (0.50, 0.71) | 0.71 (0.63, 0.80) | 0.11                |
| <b>Primary disease site</b>  |                   |                        |       |       |                    |                   |                   |                     |
| NSCLC                        | 8                 | 4,406                  | 2,349 | 2,057 | 0.63 (0.53, 0.75)  | 0.59 (0.48, 0.73) | 0.71 (0.59, 0.84) | 0.20                |
| melanoma                     | 2                 | 719                    | 404   | 315   | 0.53 (0.45, 0.64)  | 0.44 (0.35, 0.56) | 0.65 (0.50, 0.85) | 0.04*               |
| Other tumors                 | 2                 | 1,305                  | 900   | 405   | 0.80 (0.71, 0.90)  | 0.82 (0.70, 0.95) | 0.72 (0.58, 0.90) | 0.38                |
| <b>Type of immunotherapy</b> |                   |                        |       |       |                    |                   |                   |                     |
| anti-PD-1/PD-L1 antibody     | 11                | 6,104                  | 3,497 | 2,607 | 0.65 (0.56, 0.74)  | 0.60 (0.50, 0.73) | 0.71 (0.63, 0.81) | 0.14                |
| Anti-CTLA-4 antibody         | 0                 | -                      | -     | -     | -                  | -                 | -                 | -                   |
| Combination treatment        | 1                 | 326                    | 156   | 170   | -                  | -                 | -                 | -                   |
| <b>Line of treatment</b>     |                   |                        |       |       |                    |                   |                   |                     |
| 0                            | 6                 | 3,319                  | 1,890 | 1,429 | 0.66 (0.54, 0.81)  | 0.59 (0.45, 0.78) | 0.75 (0.63, 0.90) | 0.15                |
| 1                            | 6                 | 3,111                  | 1,763 | 1,348 | 0.62 (0.52, 0.74)  | 0.60 (0.48, 0.76) | 0.67 (0.58, 0.76) | 0.45                |

Abbreviations: NSCLC, non-small cell lung cancer; HR, hazard ratio; CI, confidence interval

\**P*<0.05

**Supplementary Table 7.** Meta-regression analysis to evaluate the impact of covariates on the overall survival and progression-free survival in clinical trials with positive outcomes.

| Covariates                   | Overall survival              |                | Progression-free survival     |                |
|------------------------------|-------------------------------|----------------|-------------------------------|----------------|
|                              | Log HR estimate<br>(CI bound) | <i>P</i> value | Log HR estimate<br>(CI bound) | <i>P</i> value |
| Age group                    | 0.013<br>(-0.128 ~ 0.155)     | 0.852          | 0.153<br>(-0.030 ~ 0.335)     | 0.101          |
| Line of therapy              | -0.045<br>(-0.191 ~ 0.102)    | 0.550          | -0.294<br>(-0.534 ~ -0.053)   | 0.017*         |
| Tumor type (NSCLC)           | -0.001<br>(-0.224 ~ 0.221)    | 0.990          | 0.332<br>(0.051 ~ 0.612)      | 0.021*         |
| Tumor type<br>(Other tumors) | 0.018<br>(-0.188 ~ 0.223)     | 0.864          | 0.668<br>(0.273 ~ 1.063)      | 0.001**        |
| Type of<br>immunotherapy     | 0.017<br>(-0.136 ~ 0.170)     | 0.827          | 0.007<br>(-0.201 ~ 0.216)     | 0.946          |

Abbreviations: NSCLC, non-small cell lung cancer; HR, hazard ratio; CI, confidence interval

\* $P < 0.05$ ; \*\* $P < 0.01$ ;

**Supplementary Table 8.** Meta-regression analysis to evaluate the impact of covariates on the overall survival and progression-free survival, including different age cut-offs.

| Covariates                   | Overall survival              |                | Progression-free survival     |                |
|------------------------------|-------------------------------|----------------|-------------------------------|----------------|
|                              | Log HR estimate<br>(CI bound) | <i>P</i> value | Log HR estimate<br>(CI bound) | <i>P</i> value |
| Age group (age≥65)           | -0.004<br>(-0.142 ~ 0.134)    | 0.958          | 0.099<br>(-0.247 ~ 0.447)     | 0.573          |
| Age group (age≥75)           | 0.310<br>(-0.029 ~ 0.649)     | 0.073          | 0.116<br>(-0.581 ~ 0.814)     | 0.744          |
| Line of therapy              | < 0.001<br>(-0.154 ~ 0.155)   | 0.999          | -0.467<br>(-0.861 ~ -0.073)   | 0.020*         |
| Tumor type (NSCLC)           | 0.042<br>(-0.164 ~ 0.247)     | 0.691          | 0.648<br>(0.093 ~ 1.204)      | 0.022*         |
| Tumor type<br>(Other tumors) | 0.110<br>(-0.078 ~ 0.299)     | 0.252          | 0.917<br>(0.251 ~ 1.589)      | 0.007**        |
| Type of<br>immunotherapy     | 0.049<br>(-0.097 ~ 0.196)     | 0.509          | -0.101<br>(-0.423 ~ 0.222)    | 0.541          |

Abbreviations: NSCLC, non-small cell lung cancer; HR, hazard ratio; CI, confidence interval

\* $P < 0.05$ ; \*\* $P < 0.01$ ;
